# Supplementary material for: Adipose Stromal Cell-Derived Secretome Attenuates Cisplatin-Induced Injury In Vitro Surpassing the Intricate Interplay between Proximal Tubular Epithelial Cells and Macrophages
Source: MDPI journal article supplement (doi:10.3390/cells13020121), 2024-01-09
Supplement: s1 [file s1]

|                        |        |          |     |     |     |     |    |     |     |   |     |     |      |     |     |     |     |     |     |     |     |     |      |     |
|------------------------|--------|----------|-----|-----|-----|-----|----|-----|-----|---|-----|-----|------|-----|-----|-----|-----|-----|-----|-----|-----|-----|------|-----|
|                        | Cis-CM | Mean     | BDL | BDL | 68  | 5   | 11 | ADL | 975 | 2 | BDL | 4   | 2082 | BDL | 1   | 23  | 11  | 177 | BDL | ADL | BDL | 14  | 6259 | 56  |
|                        |        | SD       | 0   | 0   | 18  | 1   | 0  | 0   | 318 | 1 | 0   | 0   | 1880 | 0   | 0   | 6   | 2   | 48  | 0   | 0   | 0   | 2   | 2200 | 10  |
|                        |        | N        | 3   | 3   | 3   | 3   | 3  | 3   | 3   | 3 | 3   | 3   | 3    | 3   | 3   | 3   | 3   | 3   | 3   | 3   | 3   | 3   | 3    | 3   |
| Macrophage Monoculture | UT-CM  | Mean     | 95  | BDL | 63  | 6   | 12 | ADL | 635 | 2 | BDL | 7   | 3158 | BDL | 2   | 27  | 15  | 196 | BDL | ADL | 109 | 14  | 6333 | 52  |
|                        |        | SD       | 0   | 0   | 20  | 2   | 1  | 0   | 315 | 1 | 0   | 0   | 3193 | 0   | 1   | 10  | 6   | 61  | 0   | 0   | 0   | 2   | 1100 | 5   |
|                        |        | N        | 3   | 3   | 3   | 3   | 3  | 3   | 3   | 3 | 3   | 3   | 3    | 3   | 3   | 3   | 3   | 3   | 3   | 3   | 3   | 3   | 3    | 3   |
|                        | Cis-CM | Mean     | BDL | BDL | 62  | 5   | 12 | ADL | 833 | 2 | BDL | 5   | 1839 | BDL | 2   | 21  | 13  | 182 | BDL | ADL | BDL | 10  | 6203 | 53  |
|                        |        | SD       | 0   | 0   | 17  | 1   | 1  | 0   | 318 | 1 | 0   | 0   | 1437 | 0   | 0   | 3   | 2   | 39  | 0   | 0   | 0   | 1   | 542  | 7   |
|                        |        | N        | 3   | 3   | 3   | 3   | 3  | 3   | 3   | 3 | 3   | 3   | 3    | 3   | 3   | 3   | 3   | 3   | 3   | 3   | 3   | 3   | 3    | 3   |
| cpgiPTEC Medium        | CTRL   |          | BDL | BDL | BDL | BDL | 9  | BDL | BDL | 0 | BDL | BDL | BDL  | BDL | N/A | BDL | BDL | BDL | N/A | ADL | BDL | BDL | BDL  | BDL |
|                        | CM     | Mean     | BDL | BDL | 2   | 6   | 10 | ADL | 48  | 1 | BDL | BDL | BDL  | BDL | 1   | 20  | 8   | 96  | BDL | ADL | N/A | 10  | BDL  | 38  |
|                        |        | N (pool) | 3   | 3   | 3   | 3   | 3  | 3   | 3   | 3 | 3   | 3   | 3    | 3   | 3   | 3   | 3   | 3   | 3   | 3   | 3   | 3   | 3    | 3   |
| Macrophage Medium      | CTRL   |          | BDL | BDL | BDL | BDL | 9  | N/A | BDL | 0 | BDL | BDL | BDL  | BDL | BDL | BDL | BDL | BDL | N/A | ADL | BDL | BDL | BDL  | N/A |
|                        | CM     | Mean     | BDL | 2   | 2   | 15  | 22 | ADL | 47  | 6 | 15  | 11  | BDL  | 3   | 2   | 83  | 37  | 431 | BDL | ADL | BDL | 23  | BDL  | 69  |
|                        |        | N (pool) | 3   | 3   | 3   | 3   | 3  | 3   | 3   | 3 | 3   | 3   | 3    | 3   | 3   | 3   | 3   | 3   | 3   | 3   | 3   | 3   | 3    | 3   |

\*BDL: below detection limit; #ADL: above detection limit; N/A: unquantifiable due to beads gating/doublets.
