# Supplementary material for: Adipose Stromal Cell-Derived Secretome Attenuates Cisplatin-Induced Injury In Vitro Surpassing the Intricate Interplay between Proximal Tubular Epithelial Cells and Macrophages
Source: MDPI journal article supplement (doi:10.3390/cells13020121), 2024-01-09

## Supplementary Figure S5

**A** Correlation of SFM Thiol vs Apoptosis

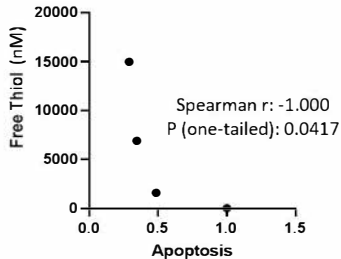

**B** Correlation of X-Vivo Thiol vs Phagocytosis

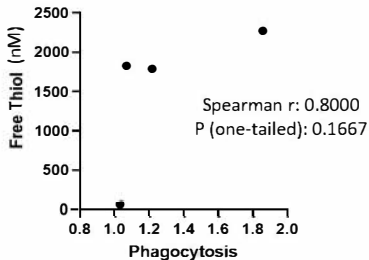

Supplement: s1 [file s1]
