# Supplementary material for: Adipose Stromal Cell-Derived Secretome Attenuates Cisplatin-Induced Injury In Vitro Surpassing the Intricate Interplay between Proximal Tubular Epithelial Cells and Macrophages
Source: MDPI journal article supplement (doi:10.3390/cells13020121), 2024-01-09
Supplement: s1 [file s1]

**Supplementary Table S1. Primer sequences used for qPCR**

| Gene    | Primer Sequence (5'-3') |                       |
|---------|-------------------------|-----------------------|
| GADD45A | F                       | GCTCAACGTAATCCACATTC  |
|         | R                       | GAGATTAATCACTGGAACCC  |
| CDKN1A  | F                       | CAGCATGACAGATTTCTACC  |
|         | R                       | CAGGGTATGTACATGAGGAG  |
| HMOX1   | F                       | CAACAAAGTGCAAGATTCTG  |
|         | R                       | TGCATTACATGGCATAAAG   |
| ATF3    | F                       | AGAAAGAGTCGGAGAAGC    |
|         | R                       | TGAAGGTTGAGCATGTATATC |
| GAPDH   | F                       | TCCACTGGCGTCTTCACC    |
|         | R                       | GGCAGAGATGATGACCCTTTT |
