# Supplementary material for: Adipose Stromal Cell-Derived Secretome Attenuates Cisplatin-Induced Injury In Vitro Surpassing the Intricate Interplay between Proximal Tubular Epithelial Cells and Macrophages
Source: Cells. 2024 Jan 9;13(2):121. doi: 10.3390/cells13020121 (PMC10814170; doi:10.3390/cells13020121)
Supplement: Supplementary file 1 [file cells-13-00121-s001.zip]

Archive with 11 entries (11 files):
- Supplementary Figure S1.pdf
- Supplementary Figure S2.pdf
- Supplementary Figure S3.pdf
- Supplementary Figure S4.pdf
- Supplementary Figure S5.pdf
- Supplementary Figure S6.pdf
- Supplementary Figure S7-part1.pdf
- Supplementary Figure S7-part2.pdf
- Supplementary Figure S8.pdf
- Table S1.pdf
- Table S2.pdf
