# Supplementary figures and images for: Adipose Stromal Cell-Derived Secretome Attenuates Cisplatin-Induced Injury In Vitro Surpassing the Intricate Interplay between Proximal Tubular Epithelial Cells and Macrophages
Source: MDPI journal article supplement (doi:10.3390/cells13020121), 2024-01-09

# Supplementary Figure S2

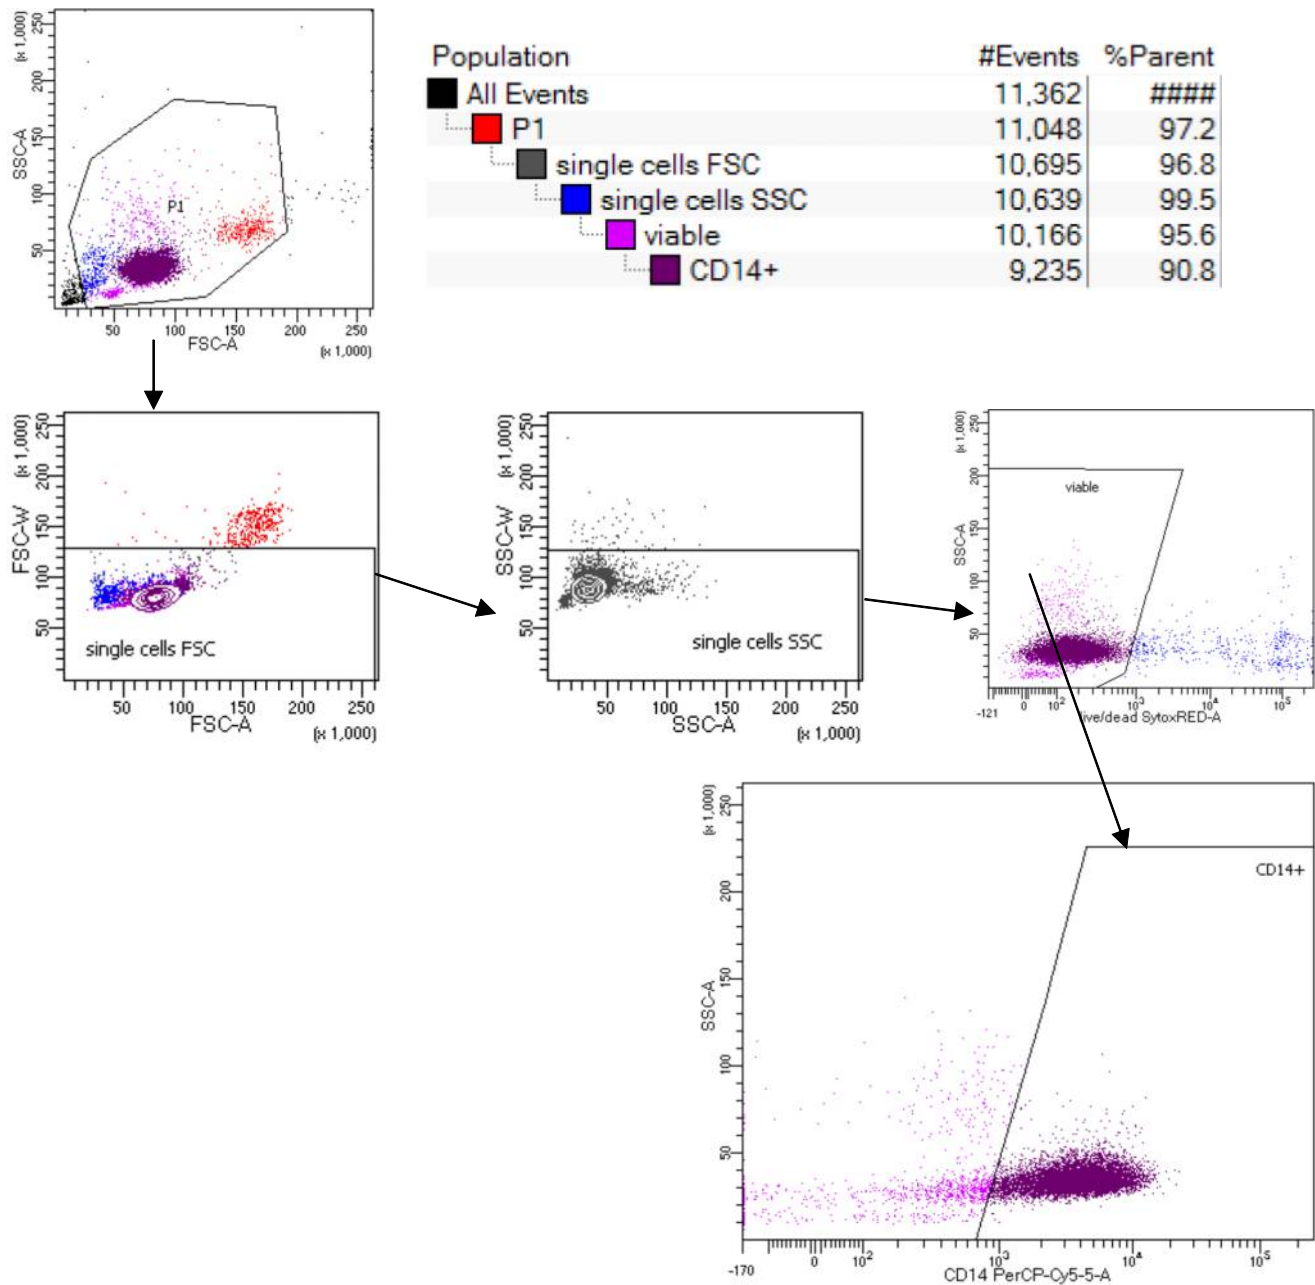

Supplement: s1 [file s1]

# Supplementary Figure S3

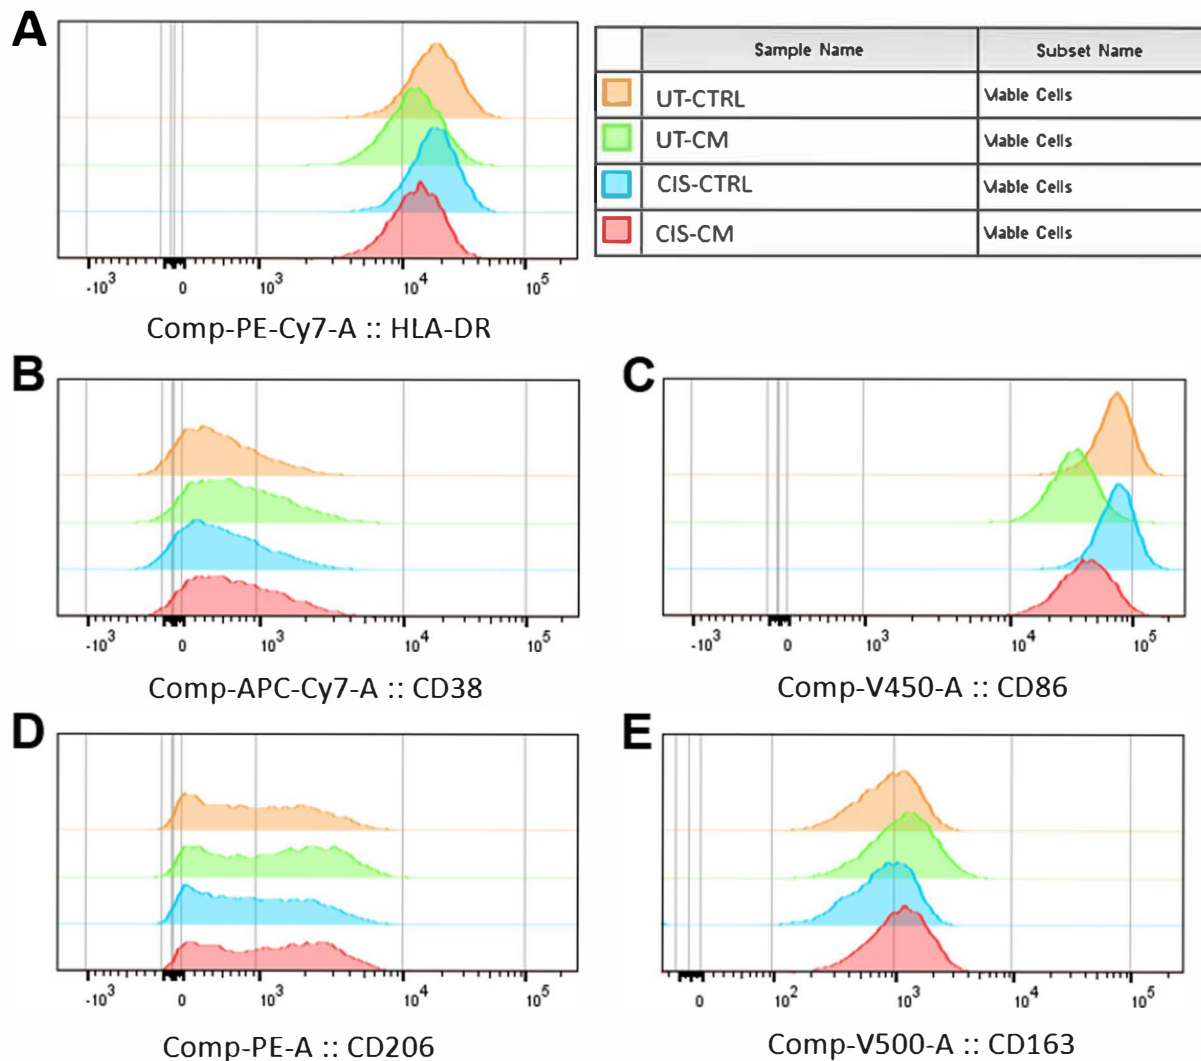

Supplement: s1 [file s1]

# Supplementary Figure S1

**A**

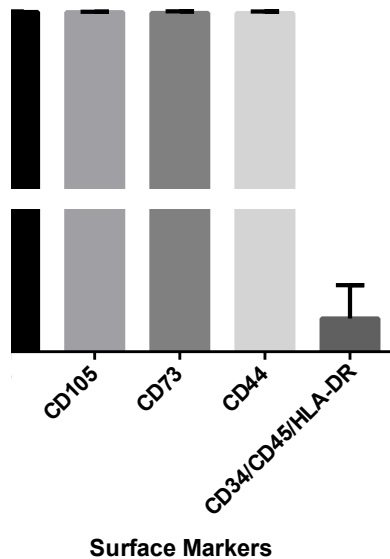

**B**

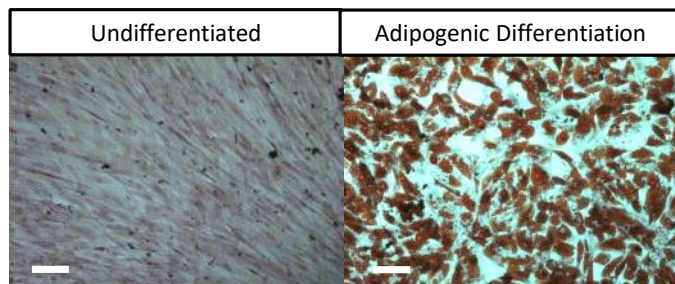

**C**

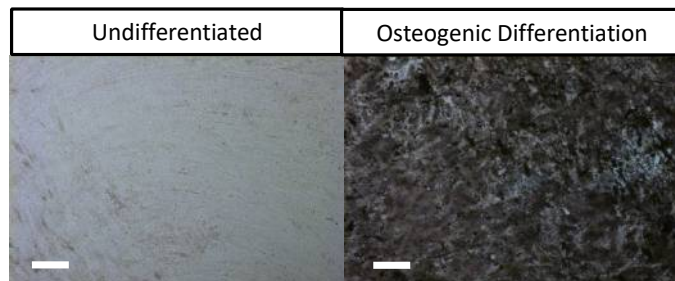

**D**

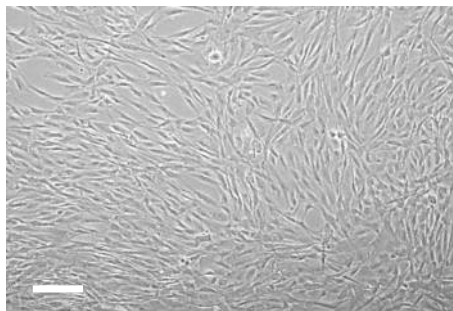

**E**

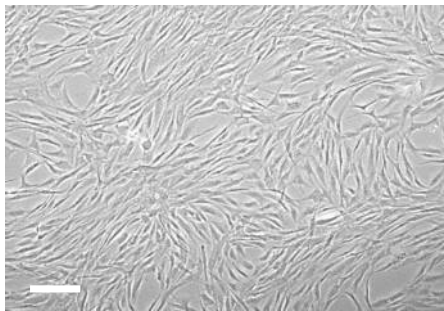

Supplement: s1 [file s1]

# Supplementary Figure S4

**A**

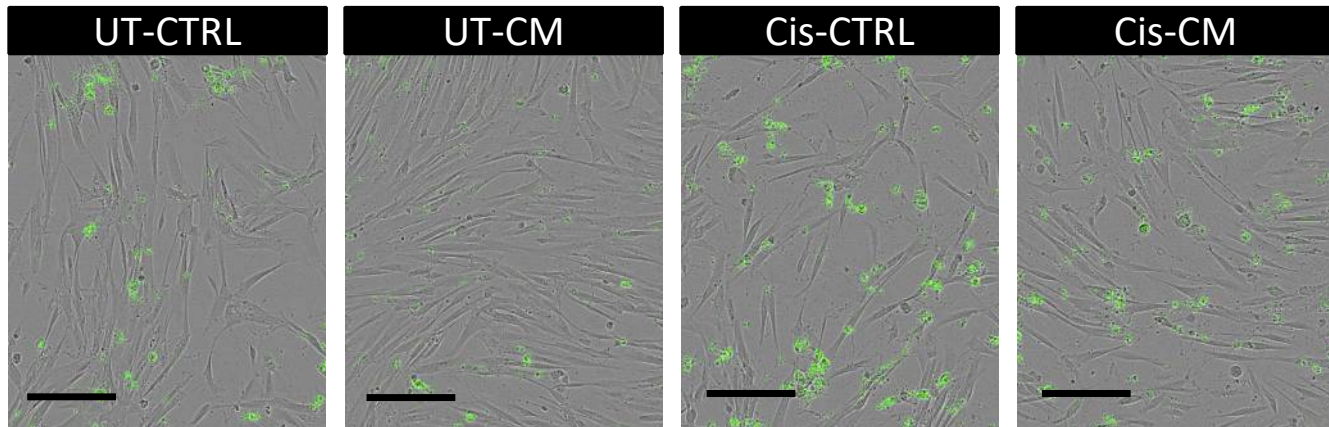

**B**

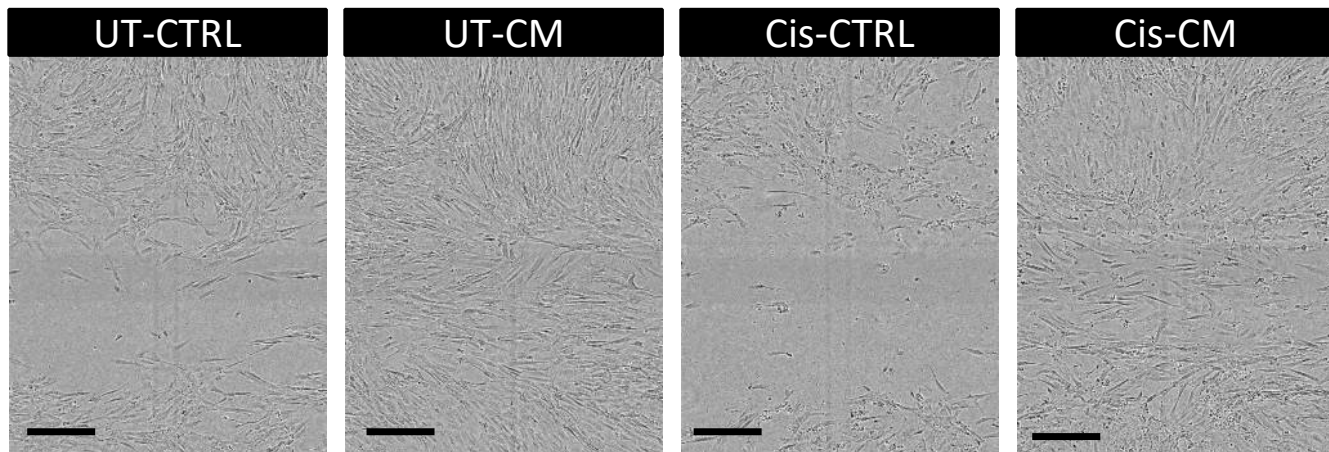

Supplement: s1 [file s1]

# Supplementary Figure S7- part 1

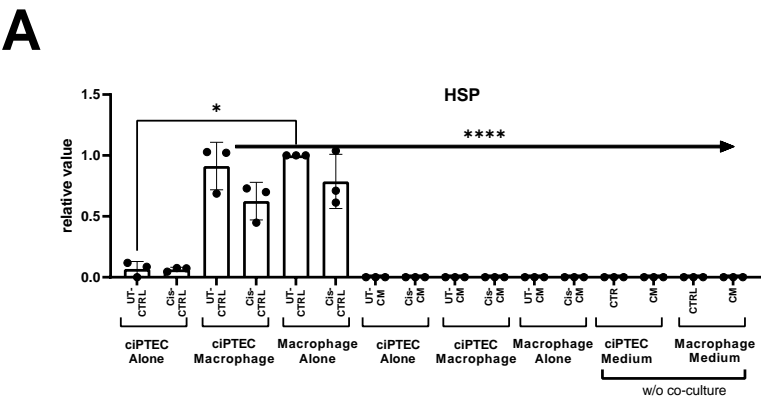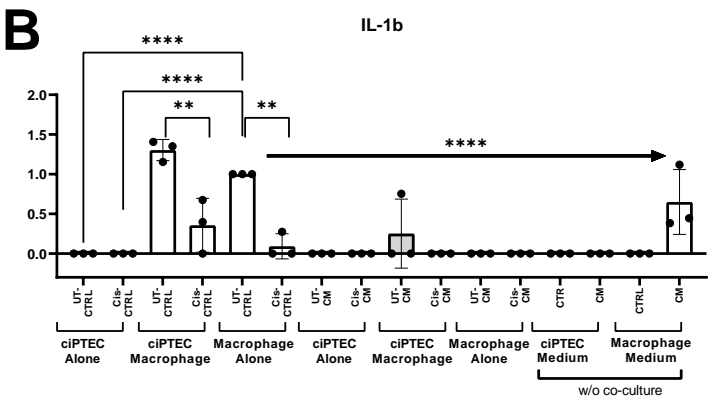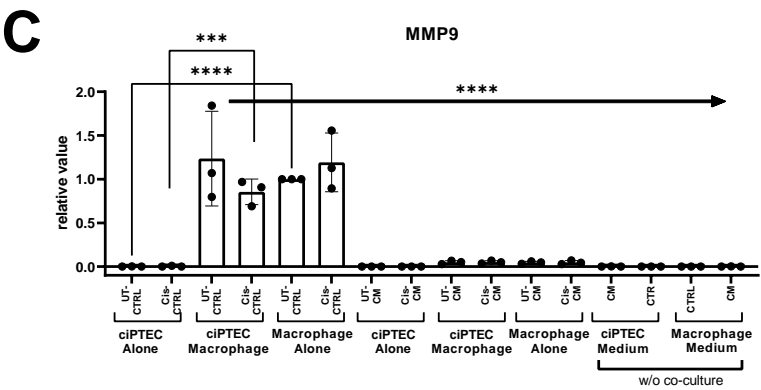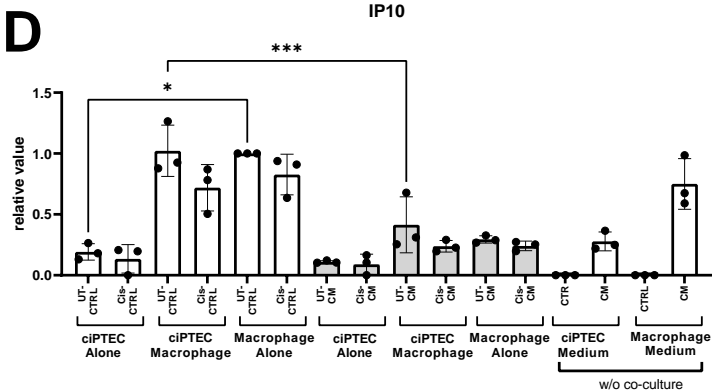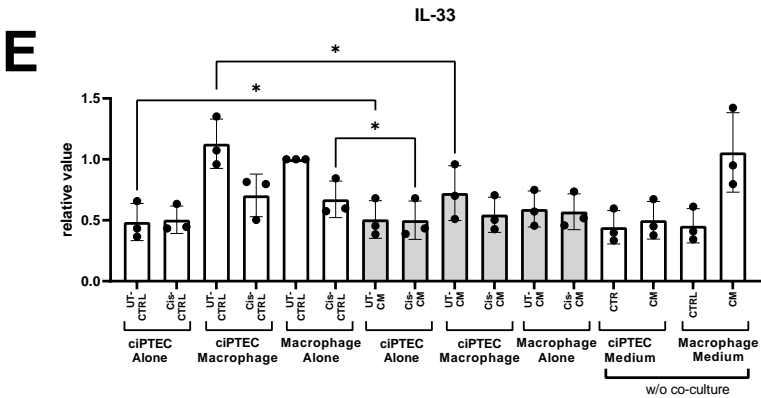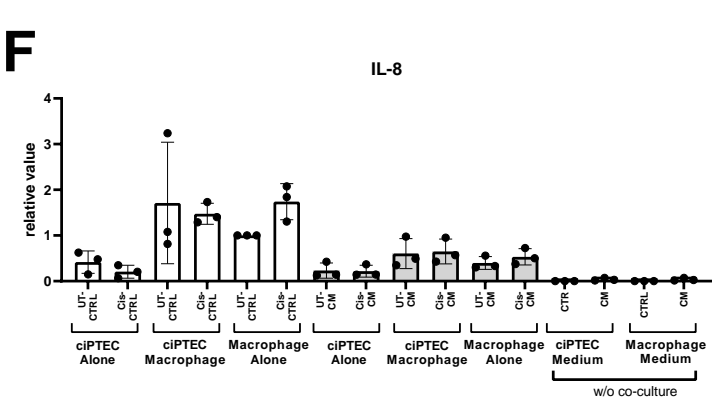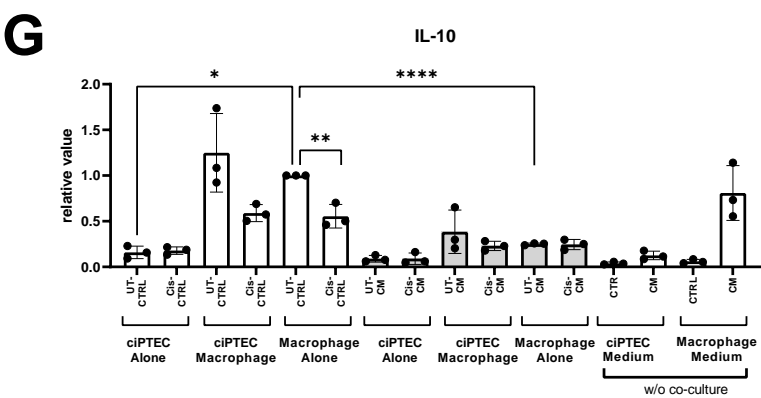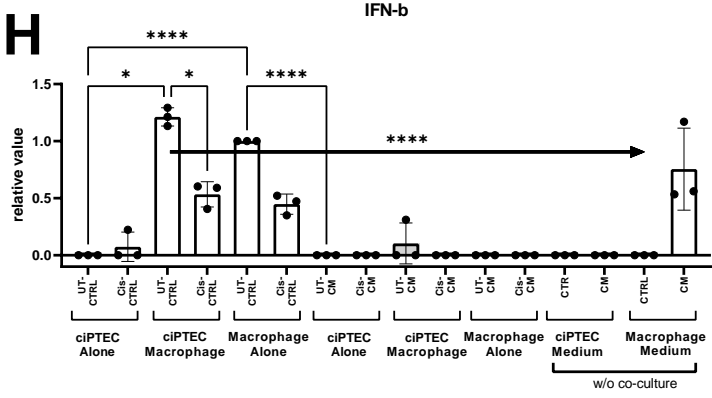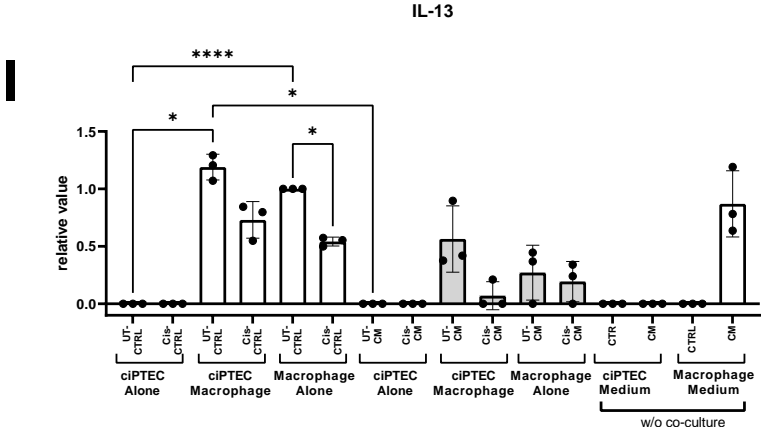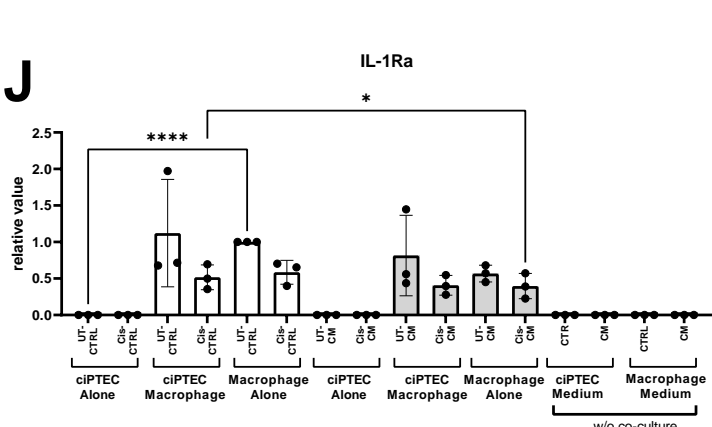

Supplement: s1 [file s1]

# Supplementary Figure S6

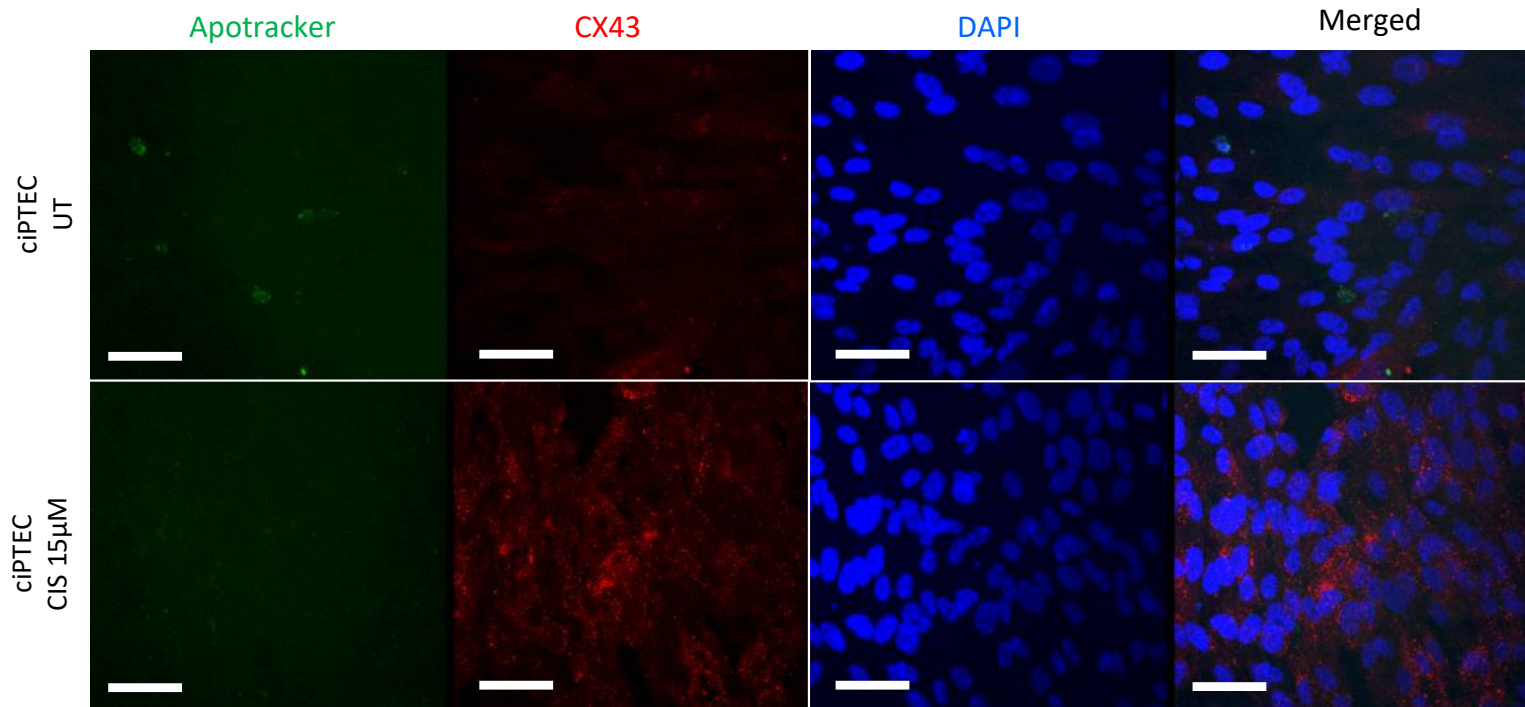

Supplement: s1 [file s1]

# Supplementary Figure S8

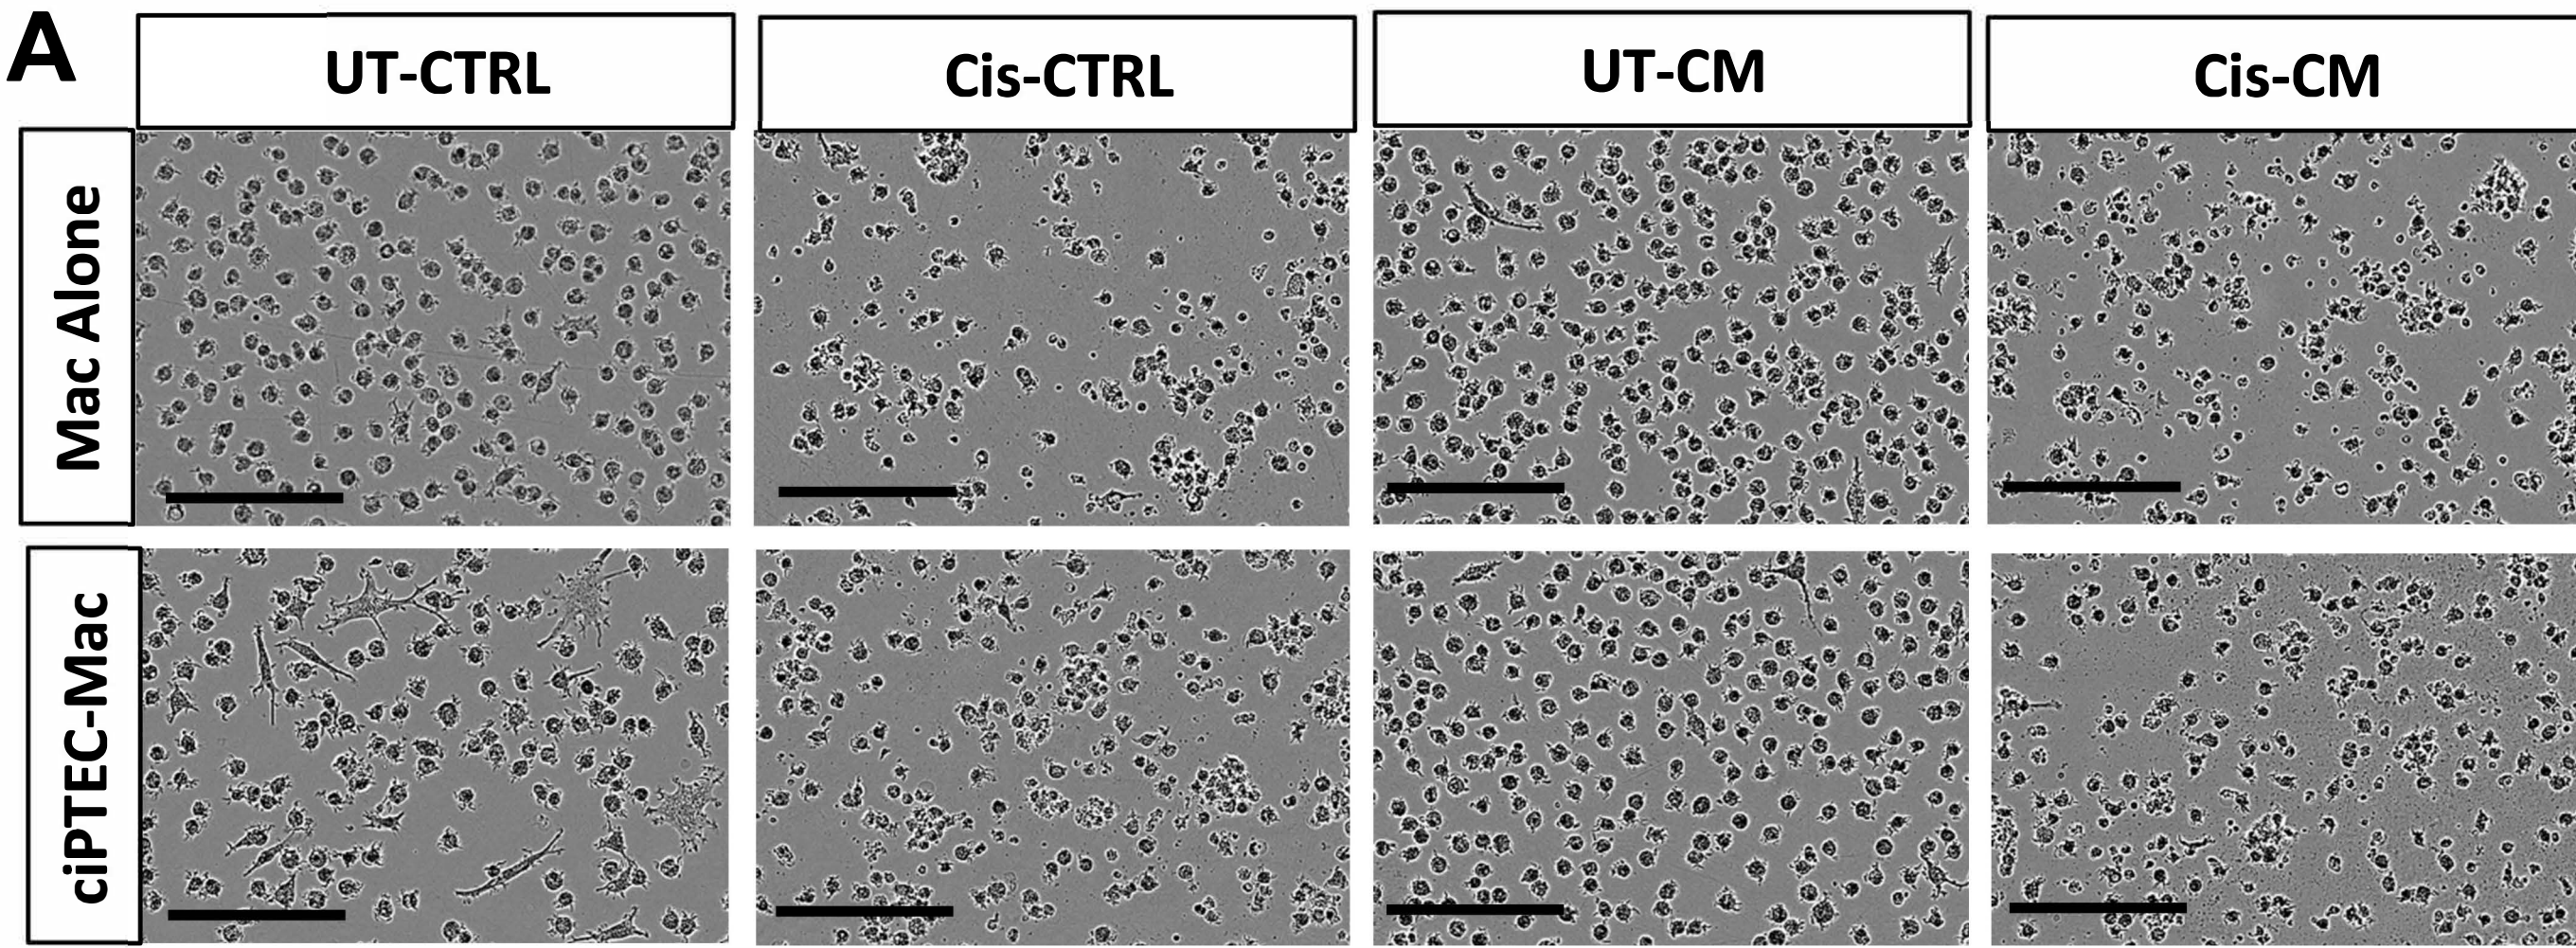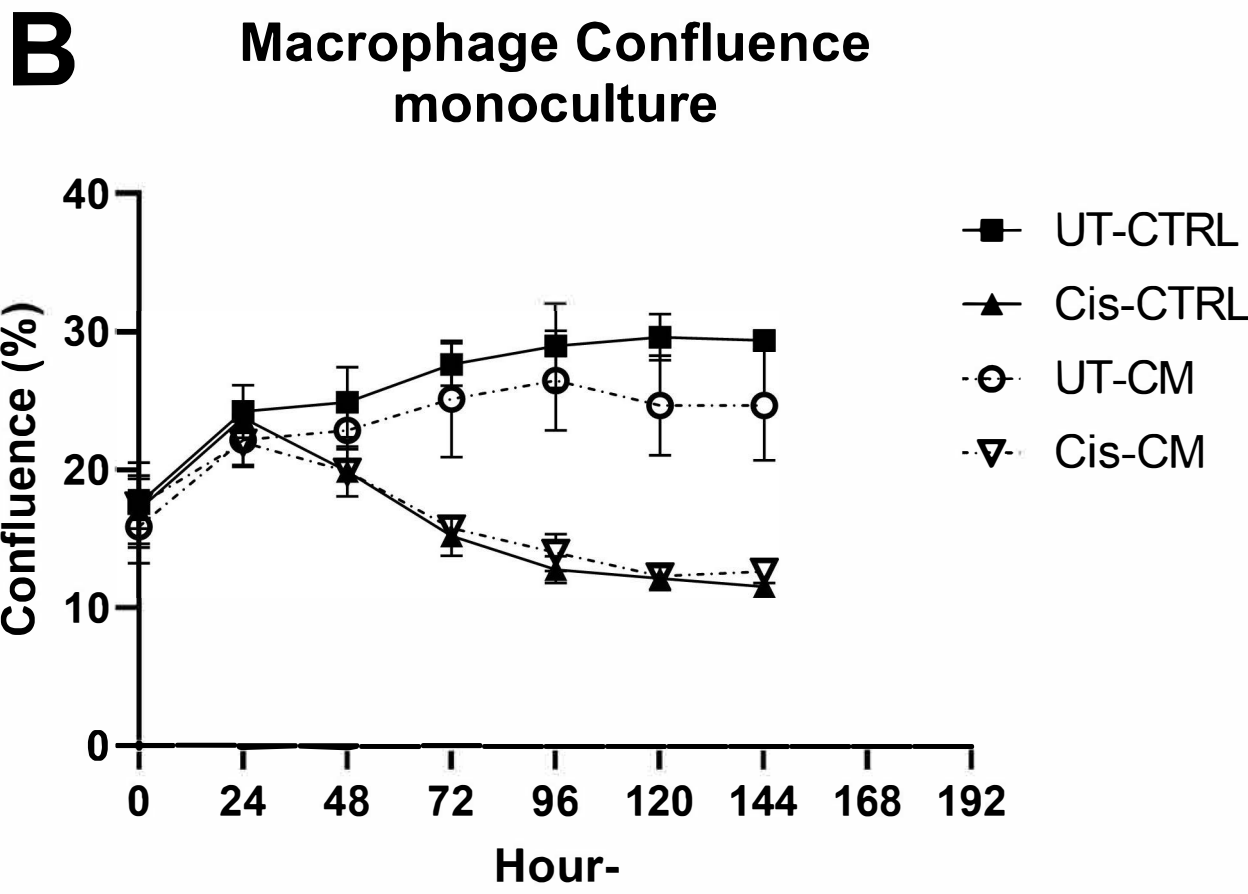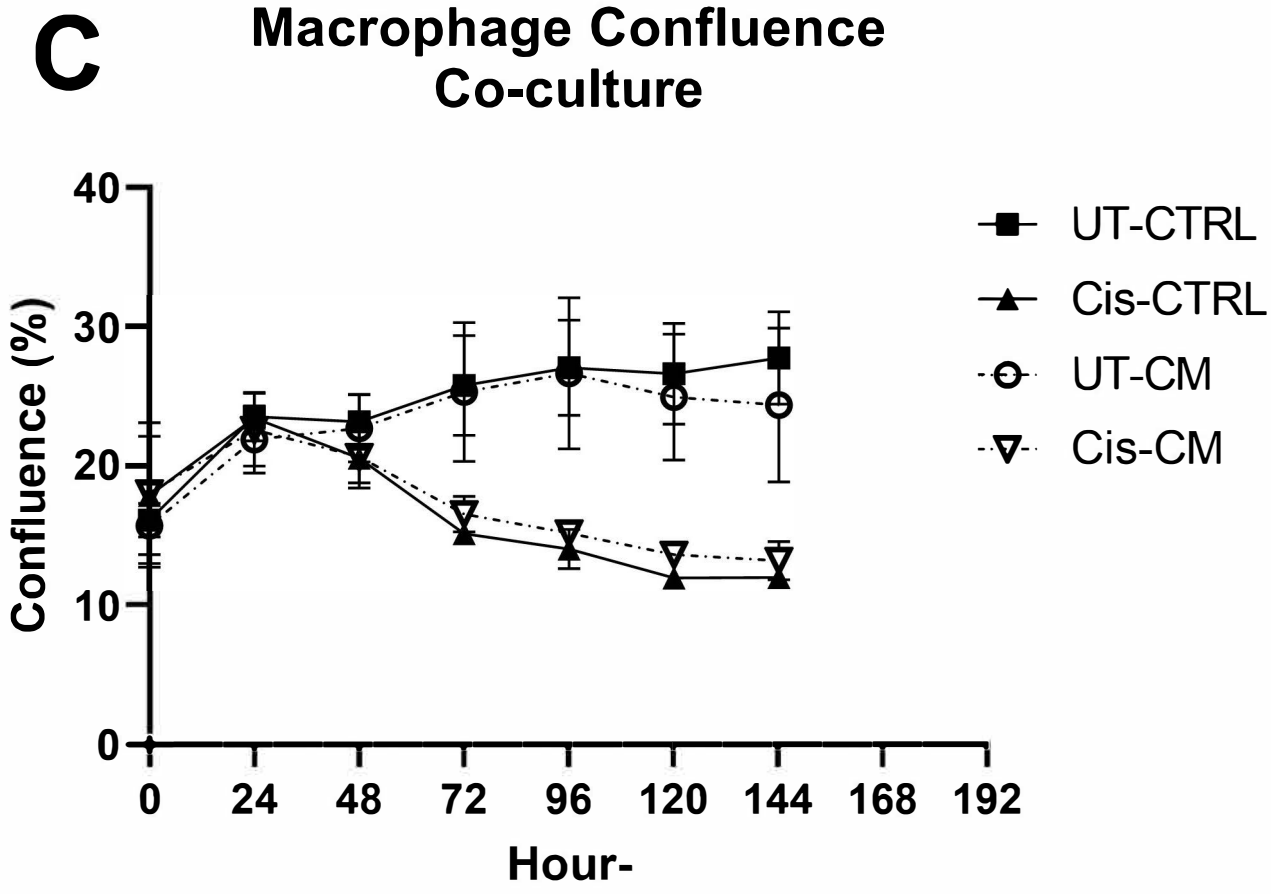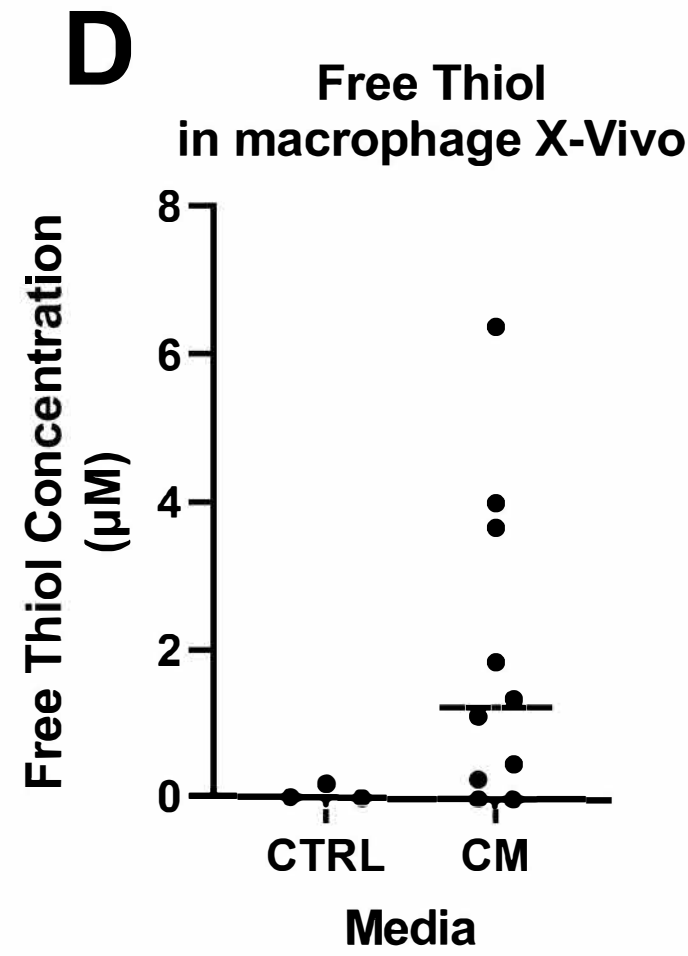

Supplement: s1 [file s1]

## Supplementary Figure S7- part 2

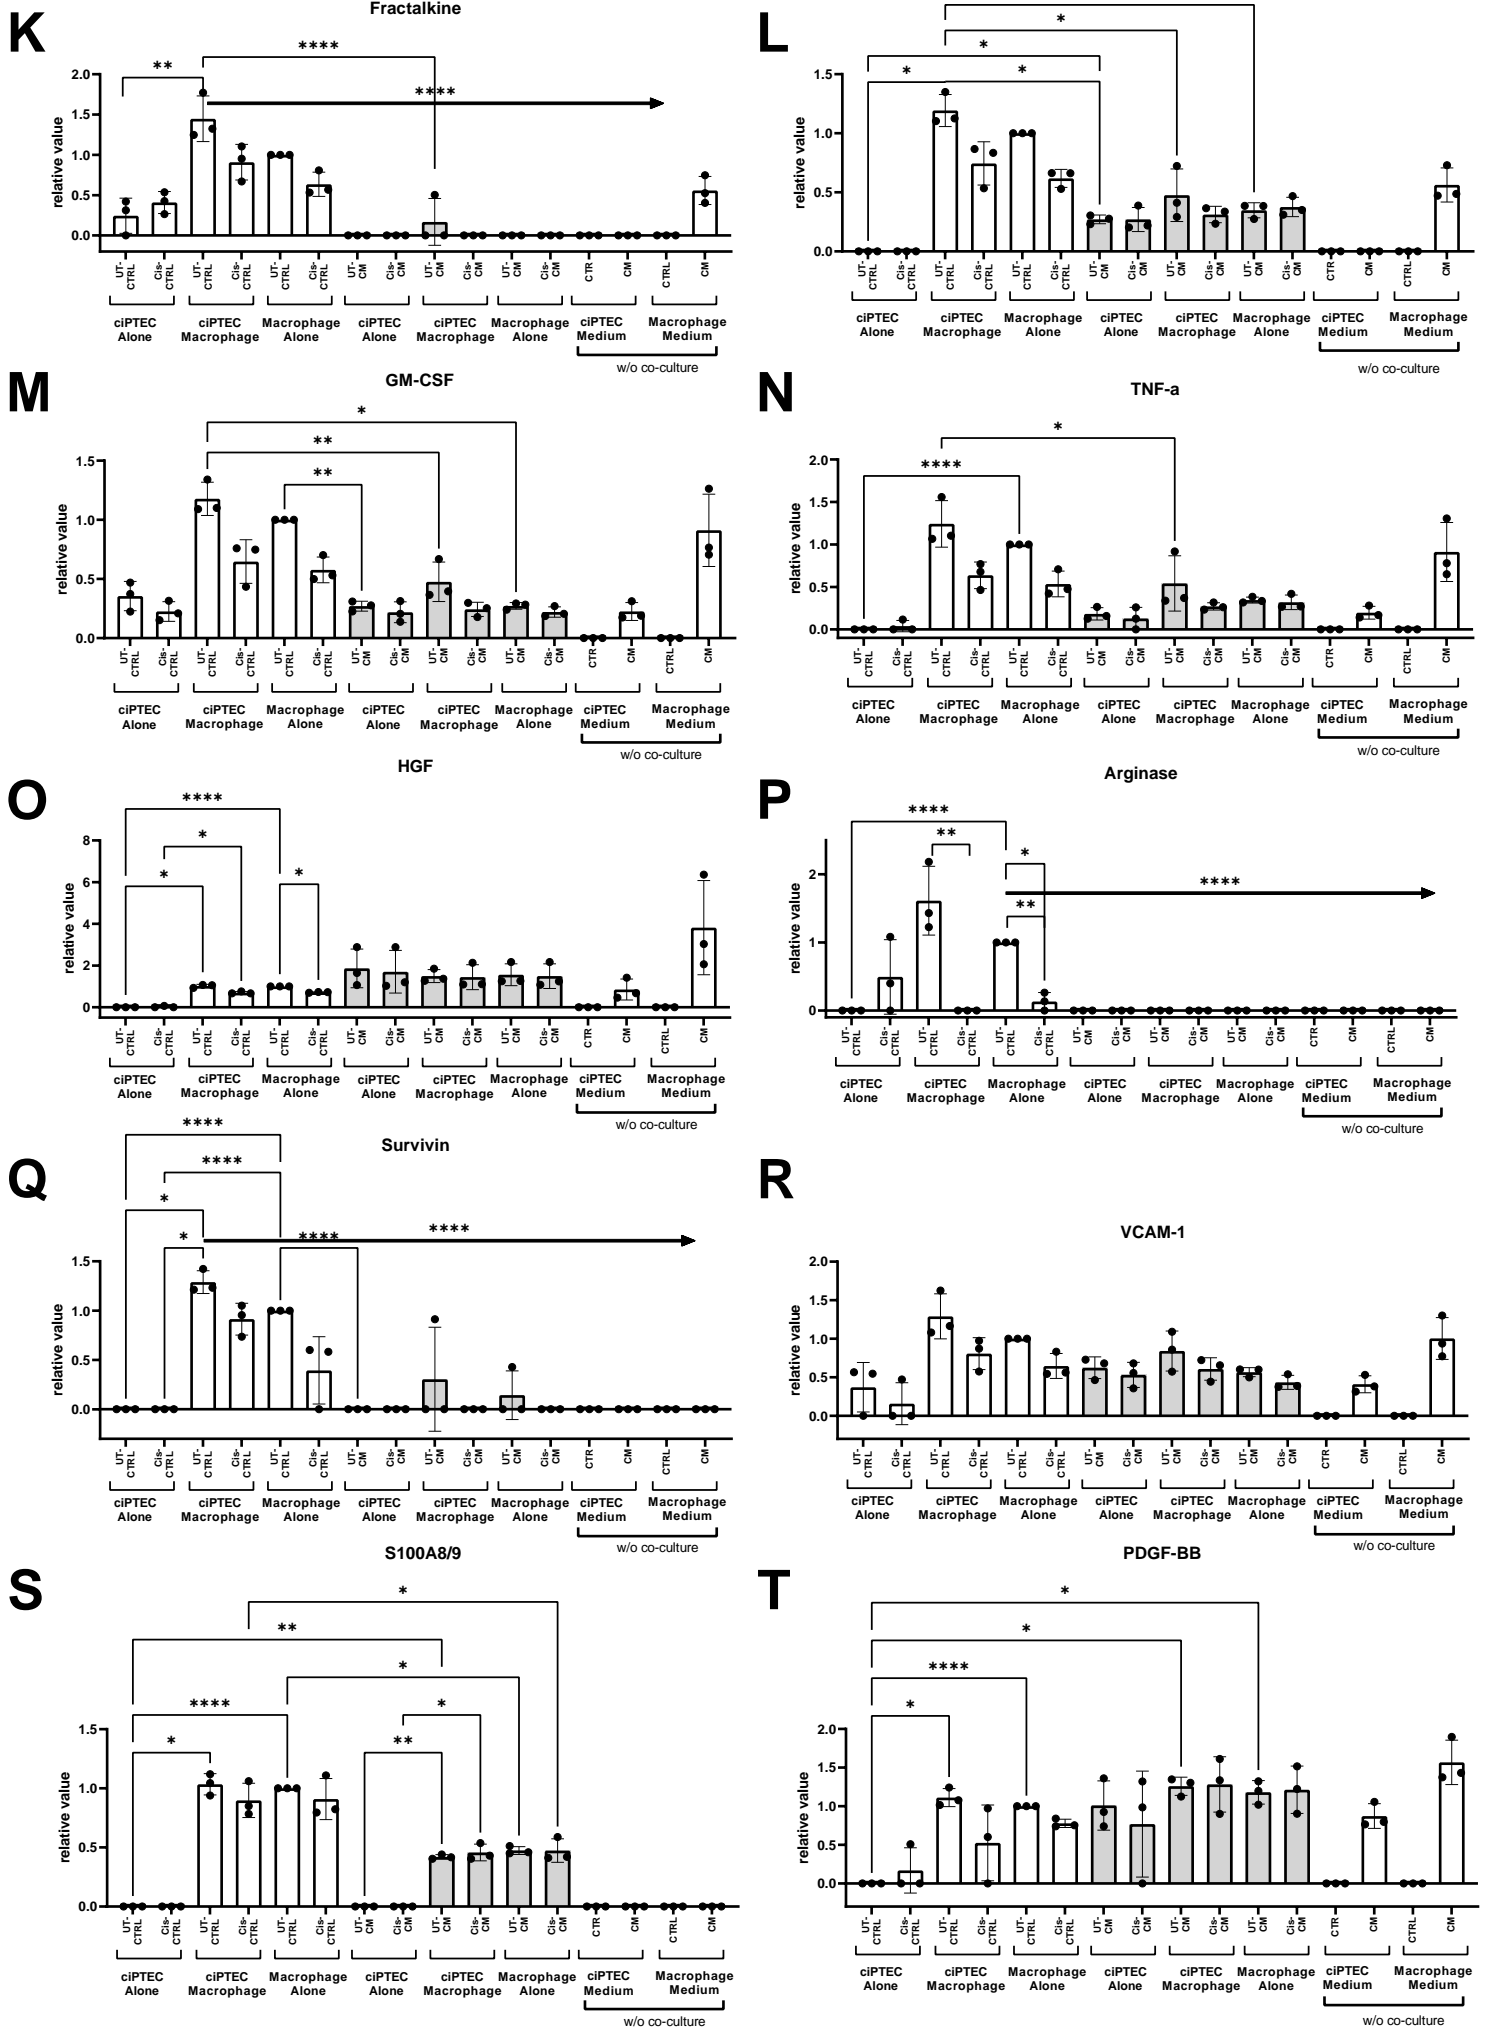

Supplement: s1 [file s1]
